# Supplementary material for: Dietary Inflammatory and Insulinemic Potentials, Plasma Metabolome and Risk of Colorectal Cancer
Source: MDPI journal article supplement (doi:10.3390/metabo13060744), 2023-06-12
Supplement: s1 [file s1]

## Supplementary materials

**Supplementary Table S1. The food components of the empirical dietary inflammatory pattern (EDIP)**

| EDIP components       | Food item                                                                                                 |
|-----------------------|-----------------------------------------------------------------------------------------------------------|
| Positive association  |                                                                                                           |
| Processed meat        | Processed meats, bacon, hot dog                                                                           |
| Red meat              | Beef, pork, lamb and hamburger patty                                                                      |
| Organ meat            | Beef, calf, pork, chicken and turkey livers                                                               |
| Other fish            | Canned tuna, shrimp, lobster, scallops, fish, and other seafood other than dark meat fish                 |
| Other vegetables      | Stick celery, mushrooms, pepper, corn, mixed vegetables, eggplant, zucchini, alfalfa sprouts and cucumber |
| Refined grain         | White bread, English muffin, bagel, roll, muffin, biscuit, white rice, pasta, pancakes and waffles        |
| High-energy beverage  | Cola with sugar, other carbonated beverages with sugar and fruit punch drinks                             |
| Low-energy beverage   | Low-energy cola, other low-energy carbonated beverages                                                    |
| Tomato                | Fresh tomato, tomato juice, tomato sauce                                                                  |
| Inverse association   |                                                                                                           |
| Beer                  | Beer                                                                                                      |
| Wine                  | Red or white wine                                                                                         |
| Tea                   | Tea (not herbal)                                                                                          |
| Coffee                | Coffee, decaffeinated coffee                                                                              |
| Dark yellow vegetable | Carrots, yellow squash, yams and sweet potatoes                                                           |
| Green leafy vegetable | Spinach, iceberg or head lettuce, romaine and leaf lettuce                                                |
| Snack                 | Potato or corn chips, popcorn and crackers                                                                |
| Fruit juice           | Apple juice or cider, orange juice, grapefruit juice and other juice                                      |
| Pizza                 | Pizza                                                                                                     |

**Supplementary Table S2. The food components of the empirical dietary index for hyperinsulinemia (EDIH)**

| EDIH components         | Food item                                                                                                                                      |
|-------------------------|------------------------------------------------------------------------------------------------------------------------------------------------|
| Positive association    |                                                                                                                                                |
| Red meat                | Beef, pork, lamb and hamburger patty                                                                                                           |
| Low-energy beverage     | Low-energy cola, other low-energy carbonated beverages                                                                                         |
| Cream soup              | Chowder or cream soup                                                                                                                          |
| Processed meat          | Processed meats, bacon, hot dog                                                                                                                |
| Margarine               | Margarine                                                                                                                                      |
| Poultry                 | Chicken, turkey                                                                                                                                |
| Butter                  | Butter                                                                                                                                         |
| French fries            | French fries                                                                                                                                   |
| Other fish              | Canned tuna, shrimp, lobster, scallops, fish, and other seafood other than dark meat fish                                                      |
| High-energy beverage    | Cola with sugar, other carbonated beverages with sugar and fruit punch drinks                                                                  |
| Tomato                  | Fresh tomato, tomato juice, tomato sauce                                                                                                       |
| Low-fat dairy products  | Skimmed or low-fat milk, sherbet or ice milk, yogurt                                                                                           |
| Eggs                    | Egg                                                                                                                                            |
| Inverse association     |                                                                                                                                                |
| Wine                    | Red or white wine                                                                                                                              |
| Coffee                  | Coffee, decaffeinated coffee                                                                                                                   |
| Whole fruits            | Raisins, grapes, avocado, banana, cantaloupe, watermelon, apple, pear, orange, grapefruit, strawberries, blueberries, peaches, apricots, plums |
| High-fat dairy products | Whole milk, cream, sour cream, ice cream, cream cheese, other cheese                                                                           |
| Green leafy vegetable   | Spinach, iceberg or head lettuce, romaine and leaf lettuce                                                                                     |

**Supplementary Table S3. Association of common metabolites of EDIP and inflammatory biomarker z-score with colorectal cancer risk**

| HMDB ID     | Metabolites              | Subclass                                 | HR per 1-SD             | HR per 1-SD             | HR per 1-SD             |
|-------------|--------------------------|------------------------------------------|-------------------------|-------------------------|-------------------------|
|             |                          |                                          | All participants        | Men                     | Women                   |
| HMDB0000201 | C2 carnitine             | Fatty acid esters                        | <b>1.18 (1.03-1.36)</b> | 1.06 (0.81-1.40)        | <b>1.24 (1.05-1.47)</b> |
| HMDB0001008 | Biliverdin               | Bilirubins                               | <b>1.16 (1.01-1.33)</b> | 1.02 (0.75-1.37)        | <b>1.21 (1.04-1.41)</b> |
| HMDB0001563 | 1-methylguanosine        | Nucleosides, nucleotides, and analogues  | <b>1.16 (1.00-1.33)</b> | <b>1.82 (1.26-2.62)</b> | 1.04 (0.88-1.22)        |
| HMDB0001276 | N-acetylsermidine        | Carboximide acids                        | 1.14 (0.99-1.30)        | 1.31 (0.94-1.84)        | 1.10 (0.94-1.28)        |
| HMDB0004824 | N2,N2-dimethylguanosine  | Nucleosides, nucleotides, and analogues  | 1.13 (0.97-1.33)        | <b>1.57 (1.08-2.29)</b> | 0.90 (0.60-1.36)        |
| HMDB0005923 | N4-acetylcytidine        | Nucleosides, nucleotides, and analogues  | 1.10 (0.96-1.26)        | 1.26 (0.93-1.70)        | 1.07 (0.91-1.26)        |
| HMDB0000026 | N-carbamoyl-beta-alanine | Ureas                                    | 1.09 (0.96-1.25)        | <b>1.43 (1.04-1.97)</b> | 1.02 (0.88-1.18)        |
| HMDB0004949 | C16:0 Ceramide           | Ceramides                                | 1.07 (0.94-1.22)        | 1.01 (0.75-1.37)        | 1.09 (0.94-1.27)        |
| HMDB0011507 | C18:2 LPE                | Glycerophosphoethanolamines              | 1.06 (0.93-1.21)        | 0.95 (0.69-1.32)        | 1.06 (0.92-1.23)        |
| HMDB0001906 | Aminoisobutyric acid     | Amino acids, peptides, and analogues     | 1.05 (0.92-1.19)        | 0.89 (0.68-1.15)        | 1.10 (0.95-1.28)        |
| HMDB0000092 | Dimethylglycine          | Amino acids, peptides, and analogues     | 1.04 (0.92-1.18)        | 1.07 (0.79-1.43)        | 1.04 (0.90-1.19)        |
| HMDB0013713 | N-acetyltryptophan       | Amino acids, peptides, and analogues     | 1.04 (0.91-1.18)        | 1.13 (0.82-1.55)        | 1.01 (0.88-1.17)        |
| HMDB0011252 | C38:4 PC plasmalogen     | Glycerophosphocholines                   | 1.01 (0.89-1.15)        | 0.93 (0.68-1.28)        | 1.02 (0.88-1.18)        |
| HMDB0000929 | Tryptophan               | Indolyl carboxylic acids and derivatives | 1.01 (0.88-1.16)        | 1.13 (0.82-1.56)        | 0.98 (0.84-1.15)        |
| HMDB0029377 | Piperine                 | Alkaloids and derivatives                | 1.00 (0.88-1.15)        | 1.03 (0.77-1.39)        | 0.99 (0.85-1.16)        |
| HMDB0008937 | C36:4 PE                 | Glycerophosphoethanolamines              | 0.99 (0.87-1.12)        | 1.09 (0.79-1.50)        | 0.96 (0.83-1.11)        |
| HMDB0011210 | C34:2 PC plasmalogen     | NA                                       | 0.99 (0.86-1.14)        | 0.65 (0.44-0.97)        | 1.06 (0.91-1.24)        |
| HMDB0000688 | C5 carnitine             | Fatty acid esters                        | 0.99 (0.86-1.13)        | 1.08 (0.81-1.45)        | 0.96 (0.83-1.12)        |
| HMDB0000699 | 1-methylnicotinamide     | Pyridinecarboxylic acids and derivatives | 0.98 (0.86-1.11)        | 0.90 (0.66-1.23)        | 0.99 (0.85-1.15)        |
| HMDB0000884 | Ribothymidine            | Nucleosides, nucleotides, and analogues  | 0.97 (0.85-1.11)        | 0.85 (0.60-1.20)        | 0.99 (0.85-1.15)        |
| HMDB0002802 | Cortisone                | Hydroxysteroids                          | 0.97 (0.85-1.11)        | 0.86 (0.64-1.15)        | 1.02 (0.87-1.19)        |
| HMDB0001847 | Caffeine                 | Purines and purine derivatives           | 0.96 (0.85-1.10)        | 1.01 (0.76-1.35)        | 0.95 (0.81-1.11)        |
| HMDB0012102 | C20:0 SM                 | Phosphosphingolipids                     | 0.96 (0.85-1.09)        | 0.97 (0.69-1.34)        | 0.95 (0.82-1.09)        |
| HMDB0000128 | Guanidoacetic acid       | Amino acids, peptides, and analogues     | 0.96 (0.84-1.10)        | 0.81 (0.61-1.07)        | 1.01 (0.86-1.18)        |
| HMDB0007883 | C34:4 PC                 | NA                                       | 0.96 (0.84-1.09)        | 1.12 (0.80-1.56)        | 0.92 (0.80-1.06)        |
| HMDB0009082 | C36:2 PE plasmalogen     | Glycerophosphoethanolamines              | 0.95 (0.83-1.08)        | <b>0.72 (0.52-0.99)</b> | 1.00 (0.86-1.15)        |
| HMDB0013130 | C5-DC carnitine          | Fatty acid esters                        | 0.90 (0.79-1.03)        | 0.95 (0.68-1.31)        | 0.89 (0.77-1.03)        |

All models were conducted using conditional logistic regression that included the matching factors only (age, sex, time of blood collection, race/ethnicity, and menopausal status for women) and further adjusted for BMI, physical activity, regular aspirin use, smoking status, family history of colorectal cancer, endoscopy, alcohol intake, coffee intake, and total calorie intake.

**Supplementary Table S4. Association of common metabolites of EDIH and C-peptide biomarker with colorectal cancer risk**

| <b>HMDB ID</b> | <b>Metabolites</b>                 | <b>Subclass</b>                          | <b>HR per 1-SD<br/>All participants</b> | <b>HR per 1-SD<br/>Men</b> | <b>HR per 1-SD<br/>Women</b> |
|----------------|------------------------------------|------------------------------------------|-----------------------------------------|----------------------------|------------------------------|
| HMDB0000824    | C3 carnitine                       | Fatty acid esters                        | <b>1.16 (1.01-1.33)</b>                 | 1.18 (0.88-1.58)           | <b>1.18 (1.00-1.38)</b>      |
| HMDB0000301    | Urocanic acid                      | Imidazoles                               | <b>1.14 (1.00-1.30)</b>                 | 1.17 (0.88-1.55)           | 1.12 (0.96-1.31)             |
| HMDB0003357    | N-acetylmethionine                 | Amino acids, peptides, and analogues     | 1.12 (0.96-1.30)                        | 1.24 (0.86-1.80)           | 1.09 (0.92-1.29)             |
| HMDB0013331    | C14:2 carnitine                    | Fatty acid esters                        | 1.10 (0.96-1.26)                        | 1.26 (0.93-1.70)           | 1.07 (0.91-1.26)             |
| HMDB0008942    | C38:2 PE                           | Glycerophosphoethanolamines              | 1.09 (0.96-1.25)                        | <b>1.43 (1.04-1.97)</b>    | 1.02 (0.88-1.18)             |
| HMDB0004193    | N1-methyl-2-pyridone-5-carboxamide | Pyridinecarboxylic acids and derivatives | 1.05 (0.91-1.21)                        | 1.14 (0.84-1.55)           | 1.00 (0.85-1.18)             |
| HMDB0000161    | Alanine                            | Amino acids, peptides, and analogues     | 1.04 (0.92-1.18)                        | 1.07 (0.79-1.44)           | 1.04 (0.90-1.19)             |
| HMDB0029377    | Piperine                           | NA                                       | 1.03 (0.90-1.18)                        | 0.74 (0.53-1.02)           | 1.11 (0.95-1.30)             |
| HMDB0000897    | 7-methylguanine                    | Purines and purine derivatives           | 1.03 (0.90-1.17)                        | 1.12 (0.83-1.53)           | 1.00 (0.86-1.16)             |
| HMDB0000092    | Dimethylglycine                    | Amino acids, peptides, and analogues     | 1.03 (0.89-1.18)                        | 1.03 (0.74-1.44)           | 1.03 (0.89-1.20)             |
| HMDB0000177    | Histidine                          | Amino acids, peptides, and analogues     | 1.01 (0.89-1.16)                        | 0.92 (0.69-1.23)           | 1.05 (0.90-1.21)             |
| HMDB0011244    | C36:3 PC plasmalogen-A             | NA                                       | 1.00 (0.88-1.15)                        | 1.03 (0.77-1.39)           | 0.99 (0.85-1.16)             |
| HMDB0000904    | Citrulline                         | Amino acids, peptides, and analogues     | 1.00 (0.88-1.14)                        | 0.79 (0.57-1.09)           | 1.04 (0.90-1.20)             |
| HMDB0005391    | C54:6 TAG                          | Triradylglycerols                        | 0.99 (0.87-1.14)                        | 0.98 (0.72-1.34)           | 0.98 (0.84-1.15)             |
| HMDB0001325    | Trimethyllysine                    | Amino acids, peptides, and analogues     | 0.99 (0.87-1.13)                        | 1.26 (0.94-1.69)           | 0.92 (0.79-1.08)             |
| HMDB0005923    | N4-acetylcytidine                  | Nucleosides, nucleotides, and analogues  | 0.97 (0.85-1.11)                        | 0.79 (0.59-1.06)           | 1.03 (0.88-1.19)             |
| HMDB0000063    | Cortisol                           | Hydroxysteroids                          | 0.94 (0.82-1.08)                        | 1.12 (0.83-1.51)           | 0.90 (0.77-1.05)             |
| HMDB0001859    | Acetaminophen                      | 1-hydroxy-2-unsubstituted benzenoids     | 0.93 (0.80-1.09)                        | 0.91 (0.64-1.29)           | 0.95 (0.80-1.14)             |
| HMDB0000641    | Glutamine                          | Amino acids, peptides, and analogues     | 0.91 (0.79-1.04)                        | 0.80 (0.59-1.09)           | 0.93 (0.80-1.08)             |
| HMDB0000026    | N-carbamoyl-beta-alanine           | Ureas                                    | 0.90 (0.79-1.04)                        | 1.02 (0.77-1.36)           | 0.87 (0.74-1.02)             |
| HMDB0000289    | Uric acid                          | Purines and purine derivatives           | <b>0.87 (0.75-1.00)</b>                 | <b>0.74 (0.54-1.01)</b>    | 0.92 (0.78-1.08)             |

All models were conducted using conditional logistic regression that included the matching factors only (age, sex, time of blood collection, race/ethnicity, and menopausal status for women) and further adjusted for BMI, physical activity, regular aspirin use, smoking status, family history of colorectal cancer, endoscopy, alcohol intake, coffee intake, and total calorie intake.
